# Supplementary material for: Quantification and Analysis of Micro-Level Activities Data from Children Aged 1–12 Years Old for Use in the Assessments of Exposure to Recycled Tire on Turf and Playgrounds
Source: MDPI journal article supplement (doi:10.3390/ijerph19042483), 2022-02-21
Supplement: s1 [file s1]

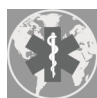

Article

# Quantification and Analysis of Micro-Level Activities Data from Children Aged 1–12 Years Old for Use in the Assessments of Exposure to Recycled Tire on Turf and Playgrounds

Nicolas Lopez-Galvez <sup>1,2,\*</sup>, Jocelyn Claude <sup>3</sup>, Patty Wong <sup>3</sup>, Asa Bradman <sup>4,5</sup>, Carly Hyland <sup>4</sup>, Rosemary Castorina <sup>4</sup>, Robert A. Canales <sup>6</sup>, Dean Billheimer <sup>1,7</sup>, Elmira Torabzadeh <sup>7</sup>, James O. Leckie <sup>8</sup> and Paloma I. Beamer <sup>1</sup>

<sup>1</sup> Mel and Enid Zuckerman College of Public Health, University of Arizona, Tucson, AZ 85724, USA; dean.billheimer@arizona.edu (D.B.); pbeamer@arizona.edu (P.I.B.)

<sup>2</sup> San Diego State University Research Foundation, School of Public Health, San Diego, CA 92182, USA

<sup>3</sup> Office of Environmental Health Hazard Assessment (OEHHHA), California Environmental Protection Agency (EPA), Sacramento, CA 95812, USA; jocelyn.claude@oehha.ca.gov (J.C.); patty.wong@oehha.ca.gov (P.W.)

<sup>4</sup> Center for Environmental Research and Children's Health, University of California, Berkeley, CA 94704, USA; abradman@berkeley.edu (A.B.); carlybarker@berkeley.edu (C.H.); rcastori@berkeley.edu (R.C.)

<sup>5</sup> Department of Public Health, School of Social Sciences, Humanities, and Arts, University of California, Merced, CA 95343, USA

<sup>6</sup> Department of Environmental and Occupational Health, Milken Institute School of Public Health, George Washington University, Washington, DC 20052, USA; rcanales@email.gwu.edu

<sup>7</sup> Center for Biomedical Informatics and Biostatistics, University of Arizona, Tucson, AZ 85724, USA; etorabzadeh@gmail.com

<sup>8</sup> Department of Civil and Environmental Engineering, Stanford University, Stanford, CA 94305, USA; leckie@stanford.edu

\* Correspondence: Correspondence: nilopez@sdsu.edu or lopezgalvez@email.arizona.edu

**Citation:** Lopez-Galvez, N.; Claude, J.; Wong, P.; Bradman, A.; Hyland, C.; Castorina, R.; Canales, R.A.; Billheimer, D.; Torabzadeh, E.; Leckie, J.O.; et al. Quantification and Analysis of Micro-Level Activities Data from Children Aged 1–12 Years Old for Use in the Assessments of Exposure to Recycled Tire on Turf and Playgrounds. *Int. J. Environ. Res. Public Health* **2022**, *19*, 2483. <https://doi.org/10.3390/ijerph19042483>

Academic Editor: Paul B. Tchounwou

Received: 25 January 2022

Accepted: 18 February 2022

Published: 21 February 2022

**Publisher's Note:** MDPI stays neutral with regard to jurisdictional claims in published maps and institutional affiliations.

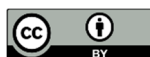

**Copyright:** © 2022 by the authors.

Licensee MDPI, Basel, Switzerland.

This article is an open access article distributed under the terms and

conditions of the Creative Commons

Attribution (CC BY) license

([https://creativecommons.org/](https://creativecommons.org/licenses/by/4.0/)

[licenses/by/4.0/](https://creativecommons.org/licenses/by/4.0/)).

## Supplementary Materials

The current supplementary information provides an additional summary of the analyzed micro-activity data of children playing on artificial turf like and playground structures. There is information on right/left hand along with both hands contact activity data. Data on mouthing events, duration and median duration is summarize as well. Results of spearman correlations and Kruskal Wallis test are also presented here. Finally, the results of the MLTAS data analyzed by several age groups and gender are presented in this summary.

*Turf:*

**Table S1.** Right hand contact frequency (event/h) while playing on the turf (n = 56).

|        | Grass  | Dietary | Non-Dietary | All objects |
|--------|--------|---------|-------------|-------------|
| Mean   | 7.20   | 3.10    | 129.40      | 132.50      |
| SD     | 17.50  | 5.40    | 54.60       | 54.30       |
| Min    | 0.00   | 0.00    | 57.30       | 57.30       |
| p25    | 1.51   | 0.00    | 93.92       | 96.00       |
| Median | 3.73   | 0.14    | 112.50      | 115.68      |
| p75    | 10.00  | 3.28    | 151.30      | 155.68      |
| p95    | 26.50  | 15.34   | 221.12      | 221.12      |
| p99    | 89.65  | 20.68   | 297.78      | 298.40      |
| Max    | 122.33 | 20.72   | 371.99      | 373.36      |

**Table S2.** Left hand contact frequency (event/h) while playing on the turf (n = 56).

|        | Grass  | Dietary | Non-Dietary | All objects |
|--------|--------|---------|-------------|-------------|
| Mean   | 7.00   | 3.10    | 134.20      | 137.30      |
| SD     | 18.20  | 5.20    | 68.10       | 67.40       |
| Min    | 0.00   | 0.00    | 9.60        | 9.60        |
| p25    | 1.22   | 0.00    | 101.04      | 103.84      |
| Median | 3.55   | 0.15    | 118.70      | 127.17      |
| p75    | 8.03   | 4.80    | 145.58      | 149.58      |
| p95    | 30.91  | 14.92   | 242.44      | 242.72      |
| p99    | 90.08  | 19.62   | 376.70      | 377.20      |
| Max    | 129.54 | 19.64   | 393.85      | 394.96      |

**Table S3.** Both hands object/surface contact frequency (event/h) (n = 56).

|           | Grass  | Dietary | Non-Dietary | All objects |
|-----------|--------|---------|-------------|-------------|
| Mean      | 14.50  | 6.10    | 276.80      | 282.90      |
| SD        | 35.50  | 10.30   | 126.70      | 125.30      |
| Min       | 0.00   | 0.00    | 107.70      | 109.70      |
| p25       | 0.78   | 0.00    | 192.78      | 205.57      |
| Median    | 4.14   | 0.71    | 236.31      | 246.32      |
| p75       | 14.93  | 8.82    | 308.21      | 324.38      |
| p95       | 48.57  | 27.03   | 503.25      | 504.34      |
| p99       | 151.84 | 40.30   | 718.79      | 719.90      |
| Max       | 251.87 | 40.33   | 765.84      | 768.32      |
| p-value * | 0.7249 | 0.935   | 0.535       | 0.546       |

\* from Wilcoxon Signed Rank test comparison of left- and right-hand contact frequency.

**Table S4.** Right hand hourly contact duration (min/h) while playing on the turf (n = 56).

|        | Grass | Dietary | Non-Dietary | All Objects |
|--------|-------|---------|-------------|-------------|
| Mean   | 0.44  | 1.75    | 33.19       | 34.94       |
| SD     | 0.97  | 3.08    | 9.61        | 9.04        |
| Min    | 0.00  | 0.00    | 11.88       | 11.88       |
| p25    | 0.00  | 0.00    | 26.33       | 29.04       |
| Median | 0.09  | 0.01    | 32.21       | 34.22       |
| p75    | 0.36  | 2.41    | 39.14       | 40.28       |
| p95    | 2.40  | 8.62    | 48.93       | 50.22       |
| p99    | 5.87  | 11.99   | 53.06       | 55.06       |

|     |      |       |       |       |
|-----|------|-------|-------|-------|
| Max | 5.87 | 11.99 | 55.06 | 55.06 |
|-----|------|-------|-------|-------|

**Table S5.** Left hand hourly contact duration (min/h) while playing on the turf (n = 56).

|        | Grass | Dietary | Non-Dietary | All objects |
|--------|-------|---------|-------------|-------------|
| Mean   | 0.45  | 1.61    | 31.94       | 33.55       |
| SD     | 0.97  | 2.77    | 10.19       | 9.90        |
| Min    | 0.00  | 0.00    | 5.68        | 5.68        |
| p25    | 0.01  | 0.00    | 26.48       | 27.20       |
| Median | 0.11  | 0.01    | 31.23       | 32.94       |
| p75    | 0.37  | 2.07    | 38.01       | 41.04       |
| p95    | 2.20  | 7.46    | 48.49       | 48.49       |
| p99    | 6.09  | 9.93    | 57.64       | 57.64       |
| Max    | 6.09  | 9.93    | 57.64       | 57.64       |

**Table S6.** Hourly object/surface contact duration for both hands while playing on turf (min/h) (n = 56).

|           | Grass | Dietary | Non-Dietary | All objects |
|-----------|-------|---------|-------------|-------------|
| Mean      | 0.93  | 1.81    | 36.57       | 38.38       |
| SD        | 1.97  | 3.08    | 13.71       | 14.60       |
| Min       | 0.00  | 0.00    | 20.65       | 22.36       |
| p25       | 0.05  | 0.00    | 29.26       | 31.55       |
| Median    | 0.24  | 0.12    | 33.33       | 34.83       |
| p75       | 1.22  | 2.47    | 35.98       | 36.97       |
| p95       | 4.63  | 8.10    | 64.64       | 67.61       |
| p99       | 8.02  | 11.90   | 81.66       | 87.12       |
| Max       | 11.96 | 12.14   | 92.96       | 105.10      |
| p-value * | 0.876 | 0.265   | 0.167       | 0.071       |

\* from Wilcoxon Signed Rank test comparison of left- and right-hand contact frequency.

**Table S7.** Right hand median contact duration while playing on the turf (s).

|        | Grass | Dietary | Non-Dietary | All Objects |
|--------|-------|---------|-------------|-------------|
| n *    | 38    | 28      | 56          | 56          |
| Mean   | 2.54  | 8.07    | 3.37        | 3.44        |
| SD     | 1.48  | 6.11    | 1.08        | 1.10        |
| Min    | 0.50  | 1.00    | 1.00        | 1.00        |
| p25    | 1.50  | 4.00    | 3.00        | 3.00        |
| Median | 2.00  | 6.50    | 3.00        | 3.00        |
| p75    | 3.00  | 11.63   | 4.00        | 4.00        |
| p95    | 5.00  | 16.65   | 5.00        | 5.00        |
| p99    | 6.83  | 24.30   | 5.73        | 5.73        |
| Max    | 8.00  | 27.00   | 6.00        | 6.00        |

\*Only participants who contacted object included in calculation of median contact duration.

**Table S8.** Left hand median contact duration while playing on the turf (s).

|      | Grass | Dietary | Non-Dietary | All objects |
|------|-------|---------|-------------|-------------|
| n *  | 42    | 28      | 56          | 56          |
| Mean | 3.52  | 7.57    | 3.28        | 3.29        |
| SD   | 4.19  | 5.63    | 0.89        | 0.87        |
| Min  | 0.50  | 1.00    | 2.00        | 2.00        |
| p25  | 2.00  | 3.00    | 3.00        | 3.00        |

|        |       |       |      |      |
|--------|-------|-------|------|------|
| Median | 2.00  | 6.50  | 3.00 | 3.00 |
| p75    | 3.00  | 10.38 | 4.00 | 4.00 |
| p95    | 12.33 | 18.13 | 5.00 | 4.63 |
| p99    | 19.48 | 20.46 | 5.23 | 5.23 |
| Max    | 20.50 | 21.00 | 5.50 | 5.50 |

\* Only participants who contacted object included in calculation of median contact duration.

**Table S9.** Both hands median contact duration while playing on the turf (s).

|           | Grass | Dietary | Non - Dietary | All objects |
|-----------|-------|---------|---------------|-------------|
| n *       | 42    | 28      | 56            | 56          |
| Mean      | 2.72  | 7.47    | 3.28          | 3.31        |
| SD        | 2.05  | 5.25    | 0.92          | 0.95        |
| Min       | 0.50  | 1.00    | 1.00          | 1.00        |
| p25       | 2.00  | 4.00    | 3.00          | 3.00        |
| Median    | 2.00  | 6.75    | 3.00          | 3.00        |
| p75       | 3.00  | 10.00   | 4.00          | 4.00        |
| p95       | 5.00  | 18.00   | 5.00          | 5.00        |
| p99       | 13.00 | 23.00   | 5.00          | 5.00        |
| Max       | 13.00 | 23.00   | 5.00          | 5.00        |
| p-value * | 0.815 | 0.367   | 0.611         | 0.245       |

\*Only participants who contacted object included in calculation of median contact duration.

\*Wilcoxon Signed Rank test comparison of left- and right-hand contact frequency.

**Table S10.** Spearman rank correlation for age (years) and both hands contact events.

| Activity Variables                            | r      | p-value |
|-----------------------------------------------|--------|---------|
| Hand contact frequency (event/h) (n = 56)     |        |         |
| Grass                                         | 0.1371 | 0.314   |
| Non-Dietary                                   | 0.0839 | 0.538   |
| Dietary                                       | −0.003 | 0.983   |
| All objects                                   | 0.087  | 0.523   |
| Hourly hand contact duration (min/h) (n = 56) |        |         |
| Grass                                         | 0.113  | 0.406   |
| Non-Dietary                                   | 0.098  | 0.471   |
| Dietary                                       | −0.083 | 0.542   |
| All objects                                   | 0.139  | 0.306   |
| Hand contact median duration (s)              |        |         |
| Grass (n = 42)                                | 0.137  | 0.314   |
| Non-Dietary (n = 56)                          | 0.084  | 0.538   |
| Dietary (n = 28)                              | −0.003 | 0.983   |
| All objects (n = 56)                          | 0.087  | 0.523   |

**Table S11.** Statistical analysis of hand contact events by EPA age groups. p-value from Kruskal-Wallis Test.

| Activity Variables                        | p-value |
|-------------------------------------------|---------|
| Hand contact frequency (event/h) (n = 56) |         |
| Grass                                     | 0.361   |
| Non-Dietary                               | 0.397   |
| Dietary                                   | 0.644   |

|                                               |       |
|-----------------------------------------------|-------|
| All objects                                   | 0.058 |
| Hourly hand contact duration (min/h) (n = 56) |       |
| Grass                                         | 0.252 |
| Non-Dietary                                   | 0.132 |
| Dietary                                       | 0.644 |
| All objects                                   | 0.165 |
| Median hand contact duration (s)              |       |
| Grass (n = 42)                                | 0.286 |
| Non-Dietary (n=56)                            | 0.116 |
| Dietary (n = 28)                              | 0.491 |
| All objects (n=56)                            | 0.165 |

**Table S12.** Statistical analysis of hand contact events younger (1–6 years) and older (7–12 years). p-value from Kruskal-Wallis Test.

| Activity Variables                            | p-value |
|-----------------------------------------------|---------|
| Hand contact frequency (event/h) (n = 56)     |         |
| Grass                                         | 0.318   |
| Non-Dietary                                   | 0.581   |
| Dietary                                       | 0.585   |
| All objects                                   | 0.584   |
| Hourly hand contact duration (min/h) (n = 56) |         |
| Grass                                         | 0.295   |
| Non-Dietary                                   | 0.264   |
| Dietary                                       | 0.328   |
| All objects                                   | 0.191   |
| Median hand contact duration (s)              |         |
| Grass (n = 42)                                | 0.884   |
| Non-Dietary (n = 56)                          | 0.061   |
| Dietary (n = 28)                              | 0.092   |
| All objects (n = 56)                          | 0.069   |

**Table S12-A.** Both hands contact frequency (event/h) while playing on turf by younger (1–6 years) and older (7–12 years).

| Age Group            |        | Grass | Dietary | Non - Dietary | All Objects |
|----------------------|--------|-------|---------|---------------|-------------|
| 1–6 years<br>n = 32  | Mean   | 9.2   | 6.4     | 280.8         | 287.2       |
|                      | SD     | 14.5  | 10.6    | 147.8         | 145.6       |
|                      | Min    | 0.0   | 0.0     | 107.7         | 109.7       |
|                      | p25    | 0.6   | 0.0     | 192.1         | 203.1       |
|                      | Median | 3.2   | 0.9     | 223.3         | 228.4       |
|                      | p75    | 14.0  | 8.8     | 307.9         | 308.4       |
|                      | p95    | 37.2  | 27.9    | 680.3         | 680.3       |
|                      | p99    | 70.0  | 40.3    | 765.8         | 768.3       |
|                      | Max    | 70.0  | 40.3    | 765.8         | 768.3       |
| 7–12 years<br>n = 24 | Mean   | 21.6  | 5.7     | 271.4         | 277.1       |
|                      | SD     | 51.3  | 10.2    | 94.4          | 94.5        |
|                      | Min    | 0.0   | 0.0     | 138.8         | 138.8       |

|        |       |      |       |       |
|--------|-------|------|-------|-------|
| p25    | 1.1   | 0.0  | 202.4 | 213.9 |
| Median | 6.9   | 0.3  | 252.5 | 252.8 |
| p75    | 15.8  | 8.6  | 314.9 | 345.1 |
| p95    | 59.2  | 26.5 | 473.6 | 473.6 |
| p99    | 251.9 | 40.3 | 494.9 | 494.9 |
| Max    | 251.9 | 40.3 | 494.9 | 494.9 |

**Table S12-B.** Both hands hourly contact duration (min/h) while playing on turf by younger (1–6 years) and older (7–12 years).

| Age Group            |        | Grass | Dietary | Non - Dietary | All Objects |
|----------------------|--------|-------|---------|---------------|-------------|
| 1–6 years<br>n = 32  | Mean   | 0.8   | 2.1     | 30.8          | 36.5        |
|                      | SD     | 1.5   | 3.3     | 10.9          | 11.8        |
|                      | Min    | 0.0   | 0.0     | 15.6          | 22.4        |
|                      | p25    | 0.0   | 0.0     | 23.7          | 29.6        |
|                      | Median | 0.2   | 0.1     | 28.6          | 34.5        |
|                      | p75    | 0.6   | 3.9     | 33.2          | 36.4        |
|                      | p95    | 4.6   | 8.2     | 59.7          | 68.7        |
|                      | p99    | 4.8   | 11.7    | 62.2          | 72.4        |
|                      | Max    | 4.8   | 11.7    | 62.2          | 72.4        |
| 7–12 years<br>n = 24 | Mean   | 1.2   | 1.4     | 35.4          | 40.8        |
|                      | SD     | 2.5   | 2.7     | 18.7          | 17.7        |
|                      | Min    | 0.0   | 0.0     | 14.7          | 22.9        |
|                      | p25    | 0.1   | 0.0     | 21.0          | 32.3        |
|                      | Median | 0.3   | 0.0     | 33.0          | 35.6        |
|                      | p75    | 0.9   | 2.2     | 35.7          | 37.2        |
|                      | p95    | 4.2   | 5.5     | 65.3          | 67.3        |
|                      | p99    | 12.0  | 12.1    | 96.0          | 105.1       |
|                      | Max    | 12.0  | 12.1    | 96.0          | 105.1       |

**Tables S12-C.** Both hands median contact duration (s) while playing on turf by younger (1–6 years) and older (7–12 years).

| Age Group  |        | Grass | Dietary | Non - Dietary | All objects |
|------------|--------|-------|---------|---------------|-------------|
| 1–6 years  | n *    | 24    | 20      | 32            | 32          |
|            | Mean   | 2.65  | 8.45    | 3.44          | 3.47        |
|            | SD     | 1.59  | 5.69    | 0.80          | 0.80        |
|            | Min    | 0.50  | 1.00    | 2.00          | 2.00        |
|            | p25    | 2.00  | 5.00    | 3.00          | 3.00        |
|            | Median | 2.00  | 7.25    | 3.50          | 4.00        |
|            | p75    | 3.00  | 10.00   | 4.00          | 4.00        |
|            | p95    | 5.00  | 20.50   | 5.00          | 5.00        |
|            | p99    | 8.00  | 23.00   | 5.00          | 5.00        |
|            | Max    | 8.00  | 23.00   | 5.00          | 5.00        |
| 7–12 years | n *    | 19    | 12      | 24            | 24          |
|            | Mean   | 2.82  | 5.83    | 3.06          | 3.10        |
|            | SD     | 2.57  | 4.12    | 1.05          | 1.10        |
|            | Min    | 1.00  | 1.00    | 1.00          | 1.00        |
|            | p25    | 2.00  | 2.75    | 2.00          | 2.00        |
|            | Median | 2.00  | 4.50    | 3.00          | 3.00        |
|            | p75    | 3.00  | 8.25    | 4.00          | 4.00        |
|            | p95    | 13.00 | 14.00   | 5.00          | 5.00        |

|     |       |       |      |      |
|-----|-------|-------|------|------|
| p99 | 13.00 | 14.00 | 5.00 | 5.00 |
| Max | 13.00 | 14.00 | 5.00 | 5.00 |

\*Only participants who contacted object included in calculation of median contact duration.

**Table S13.** Both hands contact frequency(event/h) while playing on turf by gender.

| Gender                          |        | Grass  | Dietary | Non - Dietary | All objects |
|---------------------------------|--------|--------|---------|---------------|-------------|
| Male<br>n = 27                  | Mean   | 12.54  | 5.11    | 267.70        | 272.80      |
|                                 | SD     | 15.15  | 9.45    | 137.05        | 137.48      |
|                                 | Min    | 0.00   | 0.00    | 107.69        | 109.66      |
|                                 | Median | 1.08   | 0.00    | 189.18        | 190.04      |
|                                 | p25    | 7.34   | 0.86    | 227.39        | 228.25      |
|                                 | p75    | 17.43  | 4.36    | 300.83        | 320.07      |
|                                 | p95    | 45.03  | 26.61   | 528.37        | 532.73      |
|                                 | p99    | 59.17  | 40.33   | 765.84        | 768.32      |
|                                 | Max    | 59.17  | 40.33   | 765.84        | 768.32      |
|                                 |        |        |         |               |             |
| Female<br>n = 29                | Mean   | 16.38  | 6.98    | 285.27        | 292.25      |
|                                 | SD     | 47.47  | 11.14   | 118.16        | 114.49      |
|                                 | Min    | 0.00   | 0.00    | 163.11        | 173.66      |
|                                 | Median | 0.34   | 0.00    | 211.05        | 222.22      |
|                                 | p25    | 3.78   | 0.00    | 253.24        | 253.24      |
|                                 | p75    | 9.70   | 8.86    | 325.19        | 349.05      |
|                                 | p95    | 70.00  | 27.91   | 494.87        | 494.87      |
|                                 | p99    | 251.87 | 40.28   | 680.29        | 680.29      |
|                                 | Max    | 251.87 | 40.28   | 680.29        | 680.29      |
|                                 |        |        |         |               |             |
| p-value *                       |        | 0.242  | 0.621   | 0.321         | 0.216       |
| *p-value from Wilcoxon sum rank |        |        |         |               |             |

**Tables S14.** Both hands hourly contact duration (min/h) while playing on turf by gender.

| Gender                          |        | Grass | Dietary | Non - Dietary | All objects |
|---------------------------------|--------|-------|---------|---------------|-------------|
| Male<br>n = 27                  | Mean   | 0.94  | 1.86    | 33.78         | 39.52       |
|                                 | SD     | 1.40  | 3.52    | 17.40         | 18.16       |
|                                 | Min    | 0.00  | 0.00    | 14.72         | 22.36       |
|                                 | Median | 0.09  | 0.00    | 23.44         | 30.02       |
|                                 | p25    | 0.40  | 0.13    | 29.74         | 34.01       |
|                                 | p75    | 0.96  | 2.36    | 34.97         | 37.26       |
|                                 | p95    | 4.63  | 11.71   | 62.19         | 72.41       |
|                                 | p99    | 4.79  | 12.14   | 96.03         | 105.10      |
|                                 | Max    | 4.79  | 12.14   | 96.03         | 105.10      |
|                                 |        |       |         |               |             |
| Female<br>n = 29                | Mean   | 0.92  | 1.76    | 31.82         | 37.32       |
|                                 | SD     | 2.41  | 2.66    | 12.10         | 10.48       |
|                                 | Min    | 0.00  | 0.00    | 16.75         | 23.24       |
|                                 | Median | 0.01  | 0.00    | 23.47         | 31.58       |
|                                 | p25    | 0.11  | 0.11    | 29.83         | 35.19       |
|                                 | p75    | 0.38  | 2.80    | 34.18         | 36.95       |
|                                 | p95    | 4.63  | 8.08    | 62.51         | 65.20       |
|                                 | p99    | 11.96 | 8.16    | 65.28         | 67.25       |
|                                 | Max    | 11.96 | 8.16    | 65.28         | 67.25       |
|                                 |        |       |         |               |             |
| p-value                         |        | 0.059 | 0.679   | 0.974         | 0.486       |
| *p-value from Wilcoxon sum rank |        |       |         |               |             |

**Table S15.** Both hands contact median duration (s) while playing on turf by gender.

| Gender    |        | Grass | Dietary | Non - Dietary | All objects |
|-----------|--------|-------|---------|---------------|-------------|
| Male      | n      | 22    | 27      | 27            | 27          |
|           | Mean   | 2.70  | 16.67   | 62.50         | 79.17       |
|           | SD     | 1.67  | 45.85   | 30.09         | 52.22       |
|           | Min    | 0.50  | 0.00    | 22.75         | 34.00       |
|           | Median | 2.00  | 0.00    | 39.00         | 50.50       |
|           | p25    | 2.00  | 1.50    | 57.00         | 59.00       |
|           | p75    | 3.00  | 19.00   | 80.00         | 87.00       |
|           | p95    | 5.00  | 31.50   | 114.50        | 173.00      |
|           | p99    | 8.00  | 241.00  | 159.00        | 282.50      |
|           | Max    | 8.00  | 241.00  | 159.00        | 282.50      |
| Female    | n      | 21    | 29      | 29            | 29          |
|           | Mean   | 2.54  | 9.69    | 77.80         | 87.49       |
|           | SD     | 2.12  | 33.31   | 54.47         | 65.71       |
|           | Min    | 0.50  | 0.00    | 22.50         | 22.50       |
|           | Median | 1.50  | 0.00    | 52.25         | 52.25       |
|           | p25    | 2.00  | 0.00    | 61.00         | 74.50       |
|           | p75    | 2.50  | 16.00   | 85.25         | 90.00       |
|           | p95    | 4.00  | 42.50   | 135.50        | 191.50      |
|           | p99    | 13.00 | 56.00   | 415.50        | 445.00      |
|           | Max    | 13.00 | 56.00   | 415.50        | 445.00      |
| p-value * |        | 0.324 | 0.567   | 0.358         | 0.566       |

\*p-value from Wilcoxon sum rank.

**Table S16.** Spearman rank correlation for age (1–12 years) and mouthing events while playing on turf.

| Activity Variables                         | r             | p-value      |
|--------------------------------------------|---------------|--------------|
| Mouth contact frequency (event/h) (n = 56) |               |              |
| Grass                                      | −0.221        | 0.101        |
| Hands                                      | −0.033        | 0.811        |
| Non-Dietary                                | −0.124        | 0.364        |
| Dietary                                    | −0.058        | 0.672        |
| All objects                                | −0.160        | 0.241        |
| Mouth contact duration (min/h) (n = 56)    |               |              |
| Grass                                      | −0.221        | 0.102        |
| Hands                                      | −0.194        | 0.151        |
| <b>Non-Dietary *</b>                       | <b>−0.308</b> | <b>0.021</b> |
| Dietary                                    | −0.067        | 0.625        |
| <b>All objects *</b>                       | <b>−0.266</b> | <b>0.048</b> |
| Mouth median duration (s)                  |               |              |
| Grass (n = 4)                              | 0.272         | 0.728        |
| <b>Hands * (n = 49) *</b>                  | <b>−0.357</b> | <b>0.012</b> |
| <b>Non-Dietary * (n = 52) *</b>            | <b>−0.353</b> | <b>0.010</b> |
| Dietary (n = 30)                           | −0.072        | 0.707        |
| All objects (n=53)                         | −0.254        | 0.067        |

\* Significant (p &lt; 0.05) correlation with age (Spearman's rank correlation).



**Table S17.** Mouthing contact frequency (event/h) while playing on turf by EPA age groups.

| Age Group             |        | Grass | Hands | Dietary | Non-Dietary | All Objects |
|-----------------------|--------|-------|-------|---------|-------------|-------------|
| < 2<br>(n = 8)        | Mean   | 0.34  | 12.74 | 2.79    | 25.69       | 28.48       |
|                       | SD     | 0.65  | 11.69 | 4.39    | 22.61       | 23.62       |
|                       | Min    | 0.00  | 0.66  | 0.00    | 1.48        | 2.96        |
|                       | Median | 0.00  | 3.70  | 0.00    | 9.44        | 9.44        |
|                       | p25    | 0.00  | 11.99 | 0.74    | 16.30       | 19.68       |
|                       | p75    | 0.51  | 16.56 | 4.41    | 44.37       | 51.41       |
|                       | p95    | 1.69  | 36.78 | 12.05   | 63.82       | 63.82       |
|                       | p99    | 1.69  | 36.78 | 12.05   | 63.82       | 63.82       |
|                       | Max    | 1.69  | 36.78 | 12.05   | 63.82       | 63.82       |
| 2 to < 3<br>(n = 7)   | Mean   | -     | 10.33 | 28.11   | 15.78       | 43.89       |
|                       | SD     | -     | 5.22  | 36.10   | 8.21        | 30.77       |
|                       | Min    | -     | 3.96  | 0.00    | 5.29        | 14.03       |
|                       | Median | -     | 5.85  | 0.00    | 6.68        | 15.35       |
|                       | p25    | -     | 9.58  | 2.65    | 14.03       | 29.12       |
|                       | p75    | -     | 15.84 | 74.00   | 23.35       | 79.28       |
|                       | p95    | -     | 18.53 | 80.19   | 26.47       | 86.87       |
|                       | p99    | -     | 18.53 | 80.19   | 26.47       | 86.87       |
|                       | Max    | -     | 18.53 | 80.19   | 26.47       | 86.87       |
| 3 to < 6<br>(n = 17)  | Mean   | 0.22  | 9.99  | 20.47   | 27.50       | 47.97       |
|                       | SD     | 0.65  | 11.66 | 39.23   | 43.24       | 62.07       |
|                       | Min    | 0.00  | 0.00  | 0.00    | 0.00        | 0.68        |
|                       | Median | 0.00  | 2.56  | 0.00    | 7.42        | 7.98        |
|                       | p25    | 0.00  | 6.89  | 1.74    | 10.89       | 23.70       |
|                       | p75    | 0.00  | 11.66 | 24.44   | 30.47       | 45.75       |
|                       | p95    | 2.49  | 41.04 | 159.12  | 185.14      | 205.09      |
|                       | p99    | 2.49  | 41.04 | 159.12  | 185.14      | 205.09      |
|                       | Max    | 2.49  | 41.04 | 159.12  | 185.14      | 205.09      |
| 6 to < 11<br>(n = 18) | Mean   | -     | 6.74  | 8.26    | 12.21       | 20.46       |
|                       | SD     | -     | 5.48  | 15.73   | 17.48       | 25.25       |
|                       | Min    | -     | 0.00  | 0.00    | 0.00        | 0.00        |
|                       | Median | -     | 0.54  | 0.00    | 5.86        | 5.86        |
|                       | p25    | -     | 7.12  | 0.00    | 7.79        | 8.87        |
|                       | p75    | -     | 9.00  | 7.76    | 10.85       | 28.12       |
|                       | p95    | -     | 19.25 | 48.83   | 76.19       | 76.19       |
|                       | p99    | -     | 19.25 | 48.83   | 76.19       | 76.19       |
|                       | Max    | -     | 19.25 | 48.83   | 76.19       | 76.19       |
| 11 to < 16<br>(n = 6) | Mean   | -     | 31.22 | 19.15   | 38.08       | 57.24       |
|                       | SD     | -     | 29.72 | 27.42   | 34.06       | 58.80       |
|                       | Min    | -     | 1.23  | 0.00    | 2.47        | 5.01        |
|                       | Median | -     | 4.01  | 1.00    | 4.01        | 11.73       |
|                       | p25    | -     | 27.12 | 9.02    | 38.14       | 42.53       |
|                       | p75    | -     | 47.70 | 23.44   | 57.40       | 80.84       |
|                       | p95    | -     | 80.11 | 72.43   | 88.34       | 160.77      |
|                       | p99    | -     | 80.11 | 72.43   | 88.34       | 160.77      |
|                       | Max    | -     | 80.11 | 72.43   | 88.34       | 160.77      |
| p-value *             |        | -     | 0.222 | 0.174   | 0.237       | 0.132       |

\*p-value from Kruskal-Wallis Test.

**Table S18.** Mouthing hourly contact duration (min/h) while playing on turf by EPA age groups.

| Age Group             |        | Grass | Hands        | Dietary | Non-Dietary  | All Objects |
|-----------------------|--------|-------|--------------|---------|--------------|-------------|
| < 2<br>(n = 8)        | Mean   | 0.01  | 1.13         | 0.65    | 1.54         | 2.18        |
|                       | SD     | 0.01  | 1.50         | 1.39    | 1.52         | 1.84        |
|                       | Min    | 0.00  | 0.03         | 0.00    | 0.16         | 0.16        |
|                       | Median | 0.00  | 0.24         | 0.00    | 0.30         | 0.31        |
|                       | p25    | 0.00  | 0.33         | 0.01    | 0.96         | 2.09        |
|                       | p75    | 0.01  | 2.17         | 0.58    | 2.84         | 3.98        |
|                       | p95    | 0.03  | 3.54         | 4.02    | 3.95         | 4.57        |
|                       | p99    | 0.03  | 3.54         | 4.02    | 3.95         | 4.57        |
|                       | Max    | 0.03  | 3.54         | 4.02    | 3.95         | 4.57        |
| 2 to < 3<br>(n = 7)   | Mean   | -     | 0.48         | 0.97    | 0.63         | 1.60        |
|                       | SD     | -     | 0.58         | 1.29    | 0.64         | 1.08        |
|                       | Min    | -     | 0.09         | 0.00    | 0.13         | 0.51        |
|                       | Median | -     | 0.15         | 0.00    | 0.19         | 0.67        |
|                       | p25    | -     | 0.23         | 0.28    | 0.33         | 1.39        |
|                       | p75    | -     | 0.51         | 1.71    | 0.99         | 2.04        |
|                       | p95    | -     | 1.75         | 3.45    | 1.92         | 3.65        |
|                       | p99    | -     | 1.75         | 3.45    | 1.92         | 3.65        |
|                       | Max    | -     | 1.75         | 3.45    | 1.92         | 3.65        |
| 3 to < 6<br>(n = 17)  | Mean   | 0.01  | 0.27         | 2.24    | 2.79         | 5.02        |
|                       | SD     | 0.02  | 0.38         | 3.75    | 8.27         | 9.90        |
|                       | Min    | 0.00  | 0.00         | 0.00    | 0.00         | 0.05        |
|                       | Median | 0.00  | 0.07         | 0.00    | 0.19         | 0.27        |
|                       | p25    | 0.00  | 0.17         | 0.09    | 0.36         | 0.64        |
|                       | p75    | 0.00  | 0.28         | 1.45    | 1.76         | 3.88        |
|                       | p95    | 0.10  | 1.59         | 10.53   | 34.71        | 39.65       |
|                       | p99    | 0.10  | 1.59         | 10.53   | 34.71        | 39.65       |
|                       | Max    | 0.10  | 1.59         | 10.53   | 34.71        | 39.65       |
| 6 to < 11<br>(n = 18) | Mean   | -     | 0.16         | 2.42    | 0.40         | 2.82        |
|                       | SD     | -     | 0.14         | 8.58    | 0.90         | 8.57        |
|                       | Min    | -     | 0.00         | 0.00    | 0.00         | 0.00        |
|                       | Median | -     | 0.04         | 0.00    | 0.04         | 0.04        |
|                       | p25    | -     | 0.12         | 0.00    | 0.13         | 0.20        |
|                       | p75    | -     | 0.23         | 0.23    | 0.27         | 0.88        |
|                       | p95    | -     | 0.52         | 36.52   | 3.92         | 36.66       |
|                       | p99    | -     | 0.52         | 36.52   | 3.92         | 36.66       |
|                       | Max    | -     | 0.52         | 36.52   | 3.92         | 36.66       |
| 11 to < 16<br>(n = 6) | Mean   | -     | 0.96         | 1.21    | 1.14         | 2.35        |
|                       | SD     | -     | 0.89         | 1.89    | 1.08         | 2.63        |
|                       | Min    | -     | 0.02         | 0.00    | 0.05         | 0.30        |
|                       | Median | -     | 0.15         | 0.15    | 0.15         | 0.60        |
|                       | p25    | -     | 0.79         | 0.54    | 0.92         | 1.18        |
|                       | p75    | -     | 1.75         | 1.06    | 2.07         | 3.77        |
|                       | p95    | -     | 2.25         | 4.99    | 2.71         | 7.06        |
|                       | p99    | -     | 2.25         | 4.99    | 2.71         | 7.06        |
|                       | Max    | -     | 2.25         | 4.99    | 2.71         | 7.06        |
| p-value *             |        | -     | <b>0.025</b> | 0.310   | <b>0.016</b> | 0.084       |

**Table S19.** Mouthing contact median duration (s) while playing on turf by EPA age groups.

| Age Group  |        | Grass | Hands | Dietary | Non-Dietary | All Objects |
|------------|--------|-------|-------|---------|-------------|-------------|
| < 2        | n      | 2     | 8     | 4       | 8           | 8           |
|            | Mean   | 1.00  | 3.69  | 6.88    | 3.44        | 2.63        |
|            | SD     | 0.00  | 3.83  | 5.81    | 3.90        | 2.15        |
|            | Min    | 1.00  | 1.00  | 1.00    | 1.00        | 1.00        |
|            | Median | 1.00  | 1.00  | 2.25    | 1.00        | 1.00        |
|            | p25    | 1.00  | 2.50  | 6.25    | 2.00        | 2.00        |
|            | p75    | 1.00  | 4.75  | 11.50   | 4.25        | 3.75        |
|            | p95    | 1.00  | 12.00 | 14.00   | 12.00       | 6.50        |
|            | p99    | 1.00  | 12.00 | 14.00   | 12.00       | 6.50        |
|            | Max    | 1.00  | 12.00 | 14.00   | 12.00       | 6.50        |
| 2 to < 3   | n      | 0     | 7     | 5       | 7           | 7           |
|            | Mean   | -     | 1.71  | 2.20    | 1.64        | 1.71        |
|            | SD     | -     | 0.91  | 1.10    | 0.75        | 0.76        |
|            | Min    | -     | 1.00  | 1.00    | 1.00        | 1.00        |
|            | Median | -     | 1.00  | 2.00    | 1.00        | 1.00        |
|            | p25    | -     | 1.50  | 2.00    | 1.50        | 2.00        |
|            | p75    | -     | 2.00  | 2.00    | 2.00        | 2.00        |
|            | p95    | -     | 3.50  | 4.00    | 3.00        | 3.00        |
|            | p99    | -     | 3.50  | 4.00    | 3.00        | 3.00        |
|            | Max    | -     | 3.50  | 4.00    | 3.00        | 3.00        |
| 3 to < 6   | n      | 2     | 14    | 10      | 16          | 17          |
|            | Mean   | 1.75  | 1.61  | 3.40    | 1.94        | 1.85        |
|            | SD     | 1.06  | 1.13  | 2.49    | 1.25        | 1.09        |
|            | Min    | 1.00  | 0.50  | 1.00    | 0.50        | 0.50        |
|            | Median | 1.00  | 1.00  | 2.00    | 1.00        | 1.00        |
|            | p25    | 1.75  | 1.00  | 2.75    | 1.75        | 2.00        |
|            | p75    | 2.50  | 2.00  | 4.00    | 2.50        | 2.00        |
|            | p95    | 2.50  | 5.00  | 8.50    | 5.00        | 4.00        |
|            | p99    | 2.50  | 5.00  | 8.50    | 5.00        | 4.00        |
|            | Max    | 2.50  | 5.00  | 8.50    | 5.00        | 4.00        |
| 6 to < 11  | n      | 0     | 14    | 6       | 15          | 15          |
|            | Mean   | -     | 1.29  | 21.92   | 1.27        | 5.27        |
|            | SD     | -     | 1.07  | 49.53   | 1.10        | 15.18       |
|            | Min    | -     | 1.00  | 1.00    | 0.00        | 0.00        |
|            | Median | -     | 1.00  | 1.00    | 1.00        | 1.00        |
|            | p25    | -     | 1.00  | 1.75    | 1.00        | 1.00        |
|            | p75    | -     | 1.00  | 3.00    | 1.00        | 2.00        |
|            | p95    | -     | 5.00  | 123.00  | 5.00        | 60.00       |
|            | p99    | -     | 5.00  | 123.00  | 5.00        | 60.00       |
|            | Max    | -     | 5.00  | 123.00  | 5.00        | 60.00       |
| 11 to < 16 | n      | 0     | 6     | 5       | 6           | 6           |
|            | Mean   | -     | 1.50  | 3.60    | 1.42        | 1.58        |
|            | SD     | -     | 0.55  | 3.05    | 0.49        | 0.49        |
|            | Min    | -     | 1.00  | 2.00    | 1.00        | 1.00        |
|            | Median | -     | 1.00  | 2.00    | 1.00        | 1.00        |
|            | p25    | -     | 1.50  | 2.00    | 1.25        | 1.75        |
|            | p75    | -     | 2.00  | 3.00    | 2.00        | 2.00        |

|           |   |       |       |       |       |
|-----------|---|-------|-------|-------|-------|
| p95       | - | 2.00  | 9.00  | 2.00  | 2.00  |
| p99       | - | 2.00  | 9.00  | 2.00  | 2.00  |
| Max       | - | 2.00  | 9.00  | 2.00  | 2.00  |
| p-value * | - | 0.079 | 0.604 | 0.110 | 0.521 |

\* p-value from Kruskal-Wallis Test (Only participants who contacted object included in calculation).

**Table S20.** Mouthing contact median duration (s) while playing on turf by younger (1–6 years and older (7–12) children.

| Age Group  |        | Grass | Hands | Dietary | Non-Dietary  | All Objects  |
|------------|--------|-------|-------|---------|--------------|--------------|
| 1–6 years  | n *    | 4     | 34    | 22      | 36           | 37           |
|            | Mean   | 1.38  | 2.15  | 9.07    | 2.19         | 3.61         |
|            | SD     | 0.75  | 2.21  | 25.65   | 2.16         | 9.63         |
|            | Min    | 1.00  | 0.50  | 1.00    | 0.50         | 0.50         |
|            | p25    | 1.00  | 1.00  | 2.00    | 1.00         | 1.00         |
|            | Median | 1.00  | 1.00  | 2.75    | 1.50         | 2.00         |
|            | p75    | 1.75  | 2.00  | 4.00    | 2.00         | 2.00         |
|            | p95    | 2.50  | 6.50  | 14.00   | 6.50         | 6.50         |
|            | p99    | 2.50  | 12.00 | 123.00  | 12.00        | 60.00        |
|            | Max    | 2.50  | 12.00 | 123.00  | 12.00        | 60.00        |
| 7–12 years | n *    | 0     | 15    | 8       | 16           | 16           |
|            | Mean   | -     | 1.20  | 2.81    | 1.16         | 1.22         |
|            | SD     | -     | 0.41  | 2.56    | 0.51         | 0.55         |
|            | Min    | -     | 1.00  | 1.00    | 0.00         | 0.00         |
|            | p25    | -     | 1.00  | 1.75    | 1.00         | 1.00         |
|            | Median | -     | 1.00  | 2.00    | 1.00         | 1.00         |
|            | p75    | -     | 1.00  | 2.50    | 1.25         | 1.75         |
|            | p95    | -     | 2.00  | 9.00    | 2.00         | 2.00         |
|            | p99    | -     | 2.00  | 9.00    | 2.00         | 2.00         |
|            | Max    | -     | 2.00  | 9.00    | 2.00         | 2.00         |
| p-value *  |        | -     | 0.079 | 0.377   | <b>0.030</b> | <b>0.026</b> |

\* Wilcoxon sum rank test. Only participants who contacted object included in calculation of median contact duration.

**Table S21.** Mouthing contact frequency (event/h) while playing on turf by gender.

| Gender            |        | Grass | Hands | Dietary | Non-Dietary | All Objects |
|-------------------|--------|-------|-------|---------|-------------|-------------|
| Males<br>n = 27   | Mean   | 0.10  | 12.76 | 14.30   | 19.97       | 34.28       |
|                   | SD     | 0.37  | 16.79 | 22.93   | 22.12       | 37.66       |
|                   | Min    | 0.00  | 0.00  | 0.00    | 0.00        | 0.00        |
|                   | p25    | 0.00  | 3.25  | 0.00    | 4.01        | 6.35        |
|                   | Median | 0.00  | 8.14  | 1.48    | 13.31       | 22.77       |
|                   | p75    | 0.00  | 16.61 | 30.91   | 26.47       | 59.22       |
|                   | p95    | 1.02  | 41.04 | 72.43   | 63.82       | 106.17      |
|                   | p99    | 1.69  | 80.11 | 74.00   | 88.34       | 160.77      |
|                   | Max    | 1.69  | 80.11 | 74.00   | 88.34       | 160.77      |
| Females<br>n = 29 | Mean   | 0.13  | 10.63 | 15.33   | 23.88       | 39.20       |
|                   | SD     | 0.50  | 11.38 | 33.10   | 35.92       | 50.87       |
|                   | Min    | 0.00  | 0.00  | 0.00    | 0.00        | 0.00        |
|                   | p25    | 0.00  | 4.51  | 0.00    | 7.14        | 7.42        |
|                   | Median | 0.00  | 7.14  | 0.00    | 10.85       | 18.28       |

|           |       |       |        |        |        |
|-----------|-------|-------|--------|--------|--------|
| p75       | 0.00  | 12.63 | 19.69  | 26.24  | 53.12  |
| p95       | 1.17  | 36.78 | 80.19  | 76.19  | 189.59 |
| p99       | 2.49  | 47.70 | 159.12 | 185.14 | 205.09 |
| Max       | 2.49  | 47.70 | 159.12 | 185.14 | 205.09 |
| p-value * | 0.971 | 0.825 | 0.412  | 0.737  | 0.941  |

\*p-value from Wilcoxon sum rank.

**Table S22.** Mouthing contact duration (min/h) while playing on turf by gender.

| Gender            |        | Grass | Hands | Dietary | Non-Dietary | All Objects |
|-------------------|--------|-------|-------|---------|-------------|-------------|
| Males<br>n = 27   | Mean   | 0.00  | 0.47  | 1.00    | 0.70        | 1.70        |
|                   | SD     | 0.01  | 0.75  | 2.02    | 0.87        | 2.44        |
|                   | Min    | 0.00  | 0.00  | 0.00    | 0.00        | 0.00        |
|                   | p25    | 0.00  | 0.10  | 0.00    | 0.14        | 0.27        |
|                   | Median | 0.00  | 0.20  | 0.08    | 0.30        | 0.81        |
|                   | p75    | 0.00  | 0.51  | 1.26    | 0.99        | 2.04        |
|                   | p95    | 0.02  | 1.75  | 4.99    | 2.14        | 7.06        |
|                   | p99    | 0.03  | 3.53  | 8.94    | 3.53        | 10.91       |
|                   | Max    | 0.03  | 3.53  | 8.94    | 3.53        | 10.91       |
| Females<br>n = 29 | Mean   | 0.00  | 0.45  | 2.55    | 2.03        | 4.59        |
|                   | SD     | 0.02  | 0.78  | 7.08    | 6.39        | 9.82        |
|                   | Min    | 0.00  | 0.00  | 0.00    | 0.00        | 0.00        |
|                   | p25    | 0.00  | 0.10  | 0.00    | 0.12        | 0.16        |
|                   | Median | 0.00  | 0.22  | 0.00    | 0.29        | 0.50        |
|                   | p75    | 0.00  | 0.30  | 1.06    | 1.67        | 3.88        |
|                   | p95    | 0.02  | 2.25  | 10.53   | 3.95        | 36.66       |
|                   | p99    | 0.10  | 3.54  | 36.52   | 34.71       | 39.65       |
|                   | Max    | 0.10  | 3.54  | 36.52   | 34.71       | 39.65       |
| p-value *         |        | 0.956 | 0.594 | 0.598   | 0.902       | 0.961       |

\*p-value from Wilcoxon sum rank.

**Table S23.** Mouthing median duration (s) by gender.

| Gender |        | Grass | Hands | Dietary | Non-Dietary | All Objects |
|--------|--------|-------|-------|---------|-------------|-------------|
| Male   | n *    | 2     | 25    | 17      | 25          | 26          |
|        | Mean   | 1.00  | 2.18  | 3.12    | 2.24        | 1.98        |
|        | SD     | 0.00  | 2.52  | 2.69    | 2.50        | 1.56        |
|        | Min    | 1.00  | 1.00  | 1.00    | 1.00        | 1.00        |
|        | p25    | 1.00  | 1.00  | 1.00    | 1.00        | 1.00        |
|        | Median | 1.00  | 1.00  | 2.00    | 1.00        | 1.00        |
|        | p75    | 1.00  | 2.00  | 4.00    | 2.00        | 2.00        |
|        | p95    | 1.00  | 6.50  | 9.00    | 6.50        | 5.50        |
|        | p99    | 1.00  | 12.00 | 9.00    | 12.00       | 6.50        |
|        | Max    | 1.00  | 12.00 | 9.00    | 12.00       | 6.50        |
| Female | n *    | 2     | 24    | 13      | 27          | 27          |
|        | Mean   | 1.75  | 1.52  | 13.00   | 1.54        | 3.76        |
|        | SD     | 1.06  | 0.81  | 33.24   | 0.91        | 11.27       |
|        | Min    | 1.00  | 0.50  | 1.00    | 0.00        | 0.00        |
|        | p25    | 1.00  | 1.00  | 2.00    | 1.00        | 1.00        |
|        | Median | 1.75  | 1.00  | 3.00    | 1.00        | 2.00        |
|        | p75    | 2.50  | 2.00  | 3.50    | 2.00        | 2.00        |

|           |       |       |        |       |       |
|-----------|-------|-------|--------|-------|-------|
| p95       | 2.50  | 3.00  | 123.00 | 3.00  | 4.00  |
| p99       | 2.50  | 3.50  | 123.00 | 4.00  | 60.00 |
| Max       | 2.50  | 3.50  | 123.00 | 4.00  | 60.00 |
| p-value * | 0.317 | 0.718 | 0.241  | 0.512 | 0.962 |

\*p-value from Wilcoxon sum rank.

*Playground:*

**Table S24.** Right hand frequency (event/h) while playing on the playground (n = 24).

|        | Floors | Dietary | Non-Dietary | All objects |
|--------|--------|---------|-------------|-------------|
| Mean   | 15.69  | 0.56    | 148.11      | 148.68      |
| SD     | 32.22  | 1.66    | 86.26       | 86.11       |
| Min    | 0.00   | 0.00    | 15.88       | 15.88       |
| p25    | 0.00   | 0.00    | 97.53       | 99.39       |
| Median | 4.81   | 0.00    | 128.13      | 128.13      |
| p75    | 13.49  | 0.00    | 193.30      | 193.30      |
| p95    | 69.23  | 3.71    | 327.27      | 327.27      |
| p99    | 146.70 | 7.02    | 342.86      | 342.86      |
| Max    | 146.70 | 7.02    | 342.86      | 342.86      |

**Table S25.** Left hand frequency while playing on playground (n = 24).

|        | Floors | Dietary | Non-Dietary | All objects |
|--------|--------|---------|-------------|-------------|
| Mean   | 13.95  | 1.02    | 144.55      | 145.57      |
| SD     | 20.58  | 2.83    | 79.16       | 78.79       |
| Min    | 0.00   | 0.00    | 10.71       | 10.71       |
| p25    | 0.00   | 0.00    | 95.60       | 95.60       |
| Median | 5.69   | 0.00    | 143.56      | 145.79      |
| p75    | 15.55  | 0.00    | 174.49      | 175.07      |
| p95    | 62.43  | 8.86    | 291.34      | 291.34      |
| p99    | 72.00  | 10.77   | 337.96      | 337.96      |
| Max    | 72.00  | 10.77   | 337.96      | 337.96      |

**Table S26.** Both hands object/surface contact frequency (event/h) on playground (n = 24).

|           | Floors | Dietary | Non-Dietary | All objects |
|-----------|--------|---------|-------------|-------------|
| Mean      | 29.64  | 1.58    | 292.67      | 294.25      |
| SD        | 48.01  | 3.87    | 160.75      | 160.35      |
| Min       | 0.00   | 0.00    | 30.60       | 30.60       |
| p25       | 0.00   | 0.00    | 198.42      | 204.18      |
| Median    | 12.12  | 0.00    | 261.38      | 262.28      |
| p75       | 36.31  | 0.59    | 377.91      | 378.50      |
| p95       | 141.23 | 10.77   | 602.49      | 602.49      |
| p99       | 196.37 | 15.88   | 634.20      | 634.20      |
| Max       | 196.37 | 15.88   | 634.20      | 634.20      |
| p-value * | 0.592  | 0.663   | 0.821       | 0.820       |

\* from Wilcoxon Signed Rank test comparison of left- and right-hand contact.

**Table S27.** Hourly object/surface contact duration (min/h) for right hand while playing on playground (n = 24).

|      | Floors | Dietary | Non-Dietary | All Objects |
|------|--------|---------|-------------|-------------|
| Mean | 1.04   | 0.25    | 16.50       | 16.74       |

|        |      |      |       |       |
|--------|------|------|-------|-------|
| SD     | 1.83 | 1.03 | 3.28  | 3.26  |
| Min    | 0.00 | 0.00 | 3.64  | 3.64  |
| p25    | 0.00 | 0.00 | 15.52 | 15.93 |
| Median | 0.23 | 0.00 | 17.21 | 17.52 |
| p75    | 1.17 | 0.00 | 18.62 | 18.64 |
| p95    | 6.13 | 0.75 | 19.23 | 19.23 |
| p99    | 6.26 | 5.04 | 19.85 | 19.85 |
| Max    | 6.26 | 5.04 | 19.85 | 19.85 |

**Table S28.** Hourly object/surface contact duration (min/h) for left hand while playing on play-ground (n = 24).

|        | Floors | Dietary | Non-Dietary | All Objects |
|--------|--------|---------|-------------|-------------|
| Mean   | 0.85   | 0.19    | 16.05       | 16.23       |
| SD     | 1.21   | 0.80    | 3.29        | 3.33        |
| Min    | 0.00   | 0.00    | 4.38        | 4.38        |
| p25    | 0.00   | 0.00    | 14.86       | 15.16       |
| Median | 0.19   | 0.00    | 16.97       | 17.15       |
| p75    | 1.25   | 0.00    | 18.09       | 18.24       |
| p95    | 3.54   | 0.43    | 19.82       | 19.82       |
| p99    | 3.81   | 3.93    | 20.00       | 20.00       |
| Max    | 3.81   | 3.93    | 20.00       | 20.00       |

**Table S29.** Hourly object/surface contact duration (min/h) for both hands while playing on play-ground (n = 24).

|         | Floors | Dietary | Non-Dietary | All Objects |
|---------|--------|---------|-------------|-------------|
| Mean    | 1.96   | 0.43    | 32.44       | 32.87       |
| SD      | 2.98   | 1.28    | 4.43        | 4.63        |
| Min     | 0.00   | 0.00    | 22.98       | 22.98       |
| p25     | 0.00   | 0.00    | 31.61       | 31.66       |
| Median  | 0.58   | 0.00    | 32.76       | 33.66       |
| p75     | 2.32   | 0.01    | 35.42       | 36.65       |
| p95     | 9.67   | 3.93    | 38.59       | 38.59       |
| p99     | 10.07  | 5.04    | 39.67       | 39.67       |
| Max     | 10.07  | 5.04    | 39.67       | 39.67       |
| p-value | 0.753  | 0.737   | 0.275       | 0.216       |

\* from Wilcoxon Signed Rank test comparison of left- and right-hand contact

**Table S30.** Right hand median contact duration (s) while playing on the Playground.

|        | Floors | Dietary | Non-Dietary | All Objects |
|--------|--------|---------|-------------|-------------|
| n      | 15     | 3       | 24          | 24          |
| Mean   | 4.10   | 18.67   | 4.15        | 4.13        |
| SD     | 2.35   | 26.31   | 2.31        | 2.31        |
| Min    | 1.00   | 2.00    | 1.00        | 1.00        |
| p25    | 2.50   | 3.50    | 3.00        | 3.00        |
| Median | 4.00   | 5.00    | 4.00        | 4.00        |
| p75    | 5.25   | 27.00   | 5.00        | 5.00        |
| p95    | 7.90   | 44.60   | 6.85        | 6.85        |
| p99    | 9.58   | 48.12   | 11.24       | 11.24       |
| Max    | 10.00  | 49.00   | 12.50       | 12.50       |

**Table S31.** Left hand median contact duration (s) while playing on the Playground.

|        | Floors | Dietary | Non-Dietary | All Objects |
|--------|--------|---------|-------------|-------------|
| n      | 17     | 4       | 24          | 24          |
| Mean   | 3.26   | 4.75    | 10.33       | 10.29       |
| SD     | 2.89   | 6.18    | 23.87       | 23.89       |
| Min    | 1.00   | 1.00    | 2.00        | 2.00        |
| p25    | 1.50   | 1.75    | 3.00        | 3.00        |
| Median | 3.00   | 2.00    | 4.00        | 3.75        |
| p75    | 4.00   | 5.00    | 5.00        | 5.00        |
| p95    | 7.40   | 12.20   | 50.05       | 50.20       |
| p99    | 11.88  | 13.64   | 97.66       | 97.66       |
| Max    | 13.00  | 14.00   | 109.50      | 109.50      |

**Table S32.** Both hands object/surface median duration (s) while playing on the Playground.

|         | Floors | Dietary | Non-Dietary | All Objects |
|---------|--------|---------|-------------|-------------|
| n       | 17     | 6       | 24          | 24          |
| Mean    | 3.32   | 11.75   | 3.90        | 3.94        |
| SD      | 2.32   | 18.89   | 2.24        | 2.25        |
| Min     | 1.00   | 1.00    | 1.00        | 1.00        |
| p25     | 2.00   | 2.00    | 3.00        | 3.00        |
| Median  | 2.00   | 2.25    | 4.00        | 4.00        |
| p75     | 4.00   | 11.13   | 4.00        | 4.13        |
| p95     | 6.90   | 40.25   | 6.00        | 6.00        |
| p99     | 9.78   | 47.25   | 11.01       | 11.01       |
| Max     | 10.50  | 49.00   | 12.50       | 12.50       |
| p-value | 0.136  | 0.279   | 0.942       | 0.883       |

\* from Wilcoxon Signed Rank test comparison of left- and right-hand contact.

**Table S33.** Spearman rank correlation for both hand events and age (years) while playing on playgrounds.

| Activity Variables                              | r      | p-value |
|-------------------------------------------------|--------|---------|
| Both hands contact frequency (event/h) (n = 24) |        |         |
| Floors                                          | −0.343 | 0.101   |
| Non-Dietary                                     | 0.235  | 0.270   |
| Dietary                                         | 0.054  | 0.801   |
| All objects                                     | −0.234 | 0.272   |
| Both hands contact duration (min/h) (n = 24)    |        |         |
| Floors                                          | −0.163 | 0.448   |
| Non-Dietary                                     | 0.360  | 0.084   |
| Dietary                                         | 0.061  | 0.776   |
| All objects                                     | 0.391  | 0.059   |
| Both hands median contact duration (s)          |        |         |
| Floors (n = 17)                                 | 0.274  | 0.287   |
| Non-Dietary * (n = 24)                          | −0.072 | 0.737   |
| Dietary (n = 7)                                 | 0.537  | 0.272   |
| All objects * (n = 24)                          | −0.023 | 0.916   |

\* Significant ( $p < 0.05$ ) correlation with age (Spearman's rank correlation).



**Table S33-A.** Both hands contact frequency (event/h) on playground (n = 24) while playing on playground by younger (1–6 years) and older (7–12 years).

| Age Group             |        | Floors | Dietary | Non-Dietary | All Objects |
|-----------------------|--------|--------|---------|-------------|-------------|
| 1–6 years<br>(n = 21) | Mean   | 33.24  | 1.81    | 301.30      | 303.11      |
|                       | SD     | 50.36  | 4.10    | 169.75      | 169.22      |
|                       | Min    | 0.00   | 0.00    | 30.60       | 30.60       |
|                       | p25    | 0.71   | 0.00    | 205.12      | 205.86      |
|                       | Median | 16.60  | 0.00    | 262.79      | 262.79      |
|                       | p75    | 50.83  | 1.17    | 401.54      | 401.54      |
|                       | p95    | 141.23 | 10.77   | 602.49      | 602.49      |
|                       | p99    | 196.37 | 15.88   | 634.20      | 634.20      |
|                       | Max    | 196.37 | 15.88   | 634.20      | 634.20      |
| 7–12 years<br>(n = 3) | Mean   | 4.41   | -       | 232.23      | 232.23      |
|                       | SD     | 7.64   | -       | 52.63       | 52.63       |
|                       | Min    | 0.00   | -       | 171.54      | 171.54      |
|                       | p25    | 0.00   | -       | 171.54      | 171.54      |
|                       | Median | 0.00   | -       | 259.97      | 259.97      |
|                       | p75    | 13.23  | -       | 265.19      | 265.19      |
|                       | p95    | 13.23  | -       | 265.19      | 265.19      |
|                       | p99    | 13.23  | -       | 265.19      | 265.19      |
|                       | Max    | 13.23  | -       | 265.19      | 265.19      |
| p-value               |        | 0.144  | -       | 0.513       | 0.458       |

**Table S33-B.** Both hands hourly contact duration (min/h) on playground (n = 24) while playing on playground by younger (1–6 years) and older (7–12 years).

| Age Group             |        | Floors | Dietary | Non-Dietary | All Objects |
|-----------------------|--------|--------|---------|-------------|-------------|
| 1–6 years<br>(n = 21) | Mean   | 2.19   | 0.49    | 31.98       | 32.48       |
|                       | SD     | 3.12   | 1.36    | 4.42        | 4.70        |
|                       | Min    | 0.00   | 0.00    | 22.98       | 22.98       |
|                       | p25    | 0.01   | 0.00    | 31.56       | 31.56       |
|                       | Median | 0.78   | 0.00    | 32.20       | 33.51       |
|                       | p75    | 2.88   | 0.02    | 34.39       | 36.34       |
|                       | p95    | 9.67   | 3.93    | 37.10       | 37.24       |
|                       | p99    | 10.07  | 5.04    | 39.67       | 39.67       |
|                       | Max    | 10.07  | 5.04    | 39.67       | 39.67       |
| 7–12 years<br>(n = 3) | Mean   | 0.30   | -       | 35.67       | 35.67       |
|                       | SD     | 0.51   | -       | 3.47        | 3.47        |
|                       | Min    | 0.00   | -       | 31.83       | 31.83       |
|                       | p25    | 0.00   | -       | 31.83       | 31.83       |
|                       | Median | 0.00   | -       | 36.59       | 36.59       |
|                       | p75    | 0.89   | -       | 38.59       | 38.59       |
|                       | p95    | 0.89   | -       | 38.59       | 38.59       |
|                       | p99    | 0.89   | -       | 38.59       | 38.59       |
|                       | Max    | 0.89   | -       | 38.59       | 38.59       |
| p-value               |        | 0.178  | -       | 0.206       | 0.316       |

**Table S33-C.** Both hands contact median duration (s) on playground (n = 24) while playing on playground by younger (1–6 years) and older (7–12 years).

| Age Group  |        | Floors | Dietary | Non-Dietary | All Objects |
|------------|--------|--------|---------|-------------|-------------|
| 1–6 years  | n*     | 16     | 3       | 21          | 21          |
|            | Mean   | 3.28   | 11.75   | 3.95        | 4.00        |
|            | SD     | 2.39   | 18.89   | 2.39        | 2.40        |
|            | Min    | 1.00   | 1.00    | 1.00        | 1.00        |
|            | p25    | 2.00   | 2.00    | 3.00        | 3.00        |
|            | Median | 2.00   | 2.25    | 4.00        | 4.00        |
|            | p75    | 4.00   | 14.00   | 4.00        | 4.50        |
|            | p95    | 10.50  | 49.00   | 6.00        | 6.00        |
|            | p99    | 10.50  | 49.00   | 12.50       | 12.50       |
|            | Max    | 10.50  | 49.00   | 12.50       | 12.50       |
| 7–12 years | n*     | 2      | 0       | 3           | 3           |
|            | Mean   | 4.00   | -       | 3.50        | 3.50        |
|            | SD     | 4.00   | -       | 0.50        | 0.50        |
|            | Min    | 4.00   | -       | 3.00        | 3.00        |
|            | p25    | 4.00   | -       | 3.00        | 3.00        |
|            | Median | 4.00   | -       | 3.50        | 3.50        |
|            | p75    | 4.00   | -       | 4.00        | 4.00        |
|            | p95    | 4.00   | -       | 4.00        | 4.00        |
|            | p99    | 4.00   | -       | 4.00        | 4.00        |
|            | Max    | 4.00   | -       | 4.00        | 4.00        |
| p-value    |        | 0.456  | -       | 0.622       | 0.623       |

**Table S34.** Both hands contact frequency while children play on playgrounds by gender (n = 24).

| Gender           |        | Floors | Dietary | Non-Dietary | All objects |
|------------------|--------|--------|---------|-------------|-------------|
| Male<br>n = 11   | Mean   | 42.16  | 0.36    | 272.99      | 273.35      |
|                  | SD     | 66.00  | 0.88    | 180.55      | 180.58      |
|                  | Min    | 0.00   | 0.00    | 30.60       | 30.60       |
|                  | p25    | 0.00   | 0.00    | 80.59       | 80.59       |
|                  | Median | 16.60  | 0.00    | 275.85      | 275.85      |
|                  | p75    | 58.06  | 0.00    | 401.54      | 401.54      |
|                  | p95    | 196.37 | 2.80    | 602.49      | 602.49      |
|                  | p99    | 196.37 | 2.80    | 602.49      | 602.49      |
|                  | Max    | 196.37 | 2.80    | 602.49      | 602.49      |
| Female<br>n = 13 | Mean   | 19.04  | 2.61    | 309.32      | 311.93      |
|                  | SD     | 22.85  | 5.05    | 147.34      | 146.19      |
|                  | Min    | 0.00   | 0.00    | 171.54      | 171.54      |
|                  | p25    | 0.00   | 0.00    | 205.86      | 208.83      |
|                  | Median | 11.01  | 0.00    | 259.97      | 261.77      |
|                  | p75    | 19.48  | 3.62    | 288.28      | 304.16      |
|                  | p95    | 62.43  | 15.88   | 634.20      | 634.20      |
|                  | p99    | 62.43  | 15.88   | 634.20      | 634.20      |
|                  | Max    | 62.43  | 15.88   | 634.20      | 634.20      |
| p-value*         |        | 0.224  | 0.599   | 0.257       | 0.251       |

\* from Wilcoxon Sum Rank test comparison of male and female.

**Table S35.** Both hands hourly contact duration (min/h) while children play on playgrounds by gender (n = 24).

| Gender           |        | Floors | Dietary | Non-Dietary | All objects |
|------------------|--------|--------|---------|-------------|-------------|
| Male<br>n = 11   | Mean   | 2.51   | 0.01    | 32.71       | 32.72       |
|                  | SD     | 3.31   | 0.03    | 4.43        | 4.43        |
|                  | Min    | 0.00   | 0.00    | 22.98       | 22.98       |
|                  | p25    | 0.00   | 0.00    | 31.56       | 31.56       |
|                  | Median | 0.78   | 0.00    | 32.20       | 32.20       |
|                  | p75    | 5.60   | 0.00    | 36.34       | 36.34       |
|                  | p95    | 9.67   | 0.09    | 39.67       | 39.67       |
|                  | p99    | 9.67   | 0.09    | 39.67       | 39.67       |
|                  | Max    | 9.67   | 0.09    | 39.67       | 39.67       |
| Female<br>n = 13 | Mean   | 1.49   | 0.79    | 32.22       | 33.01       |
|                  | SD     | 2.72   | 1.69    | 4.59        | 4.97        |
|                  | Min    | 0.00   | 0.00    | 23.64       | 23.64       |
|                  | Median | 0.00   | 0.00    | 31.66       | 31.76       |
|                  | p25    | 0.38   | 0.00    | 33.31       | 34.50       |
|                  | p75    | 1.65   | 0.12    | 34.50       | 36.70       |
|                  | p95    | 10.07  | 5.04    | 38.59       | 38.59       |
|                  | p99    | 10.07  | 5.04    | 38.59       | 38.59       |
|                  | Max    | 10.07  | 5.04    | 38.59       | 38.59       |
| p-value *        |        | 0.630  | 0.224   | 0.599       | 0.257       |

\* from Wilcoxon Sum Rank test comparison of male and female.

**Table S36.** Both hands median contact duration (s) while children play on playgrounds by gender.

| Gender    |        | Floors | Dietary | Non-Dietary | All objects |
|-----------|--------|--------|---------|-------------|-------------|
| Males     | n      | 8      | 2       | 11          | 11          |
|           | Mean   | 3.44   | 1.50    | 4.59        | 4.59        |
|           | SD     | 3.18   | 0.71    | 3.01        | 3.01        |
|           | Min    | 1.00   | 1.00    | 1.00        | 1.00        |
|           | Median | 1.50   | 1.00    | 3.00        | 3.00        |
|           | p25    | 2.00   | 1.50    | 4.00        | 4.00        |
|           | p75    | 4.50   | 2.00    | 6.00        | 6.00        |
|           | p95    | 10.50  | 2.00    | 12.50       | 12.50       |
|           | p99    | 10.50  | 2.00    | 12.50       | 12.50       |
|           | Max    | 10.50  | 2.00    | 12.50       | 12.50       |
| Females   | n      | 9      | 4       | 13          | 13          |
|           | Mean   | 3.22   | 16.88   | 3.31        | 3.38        |
|           | SD     | 1.39   | 22.12   | 1.13        | 1.21        |
|           | Min    | 2.00   | 2.00    | 1.00        | 1.00        |
|           | Median | 2.00   | 2.25    | 3.00        | 3.00        |
|           | p25    | 3.00   | 8.25    | 3.50        | 3.50        |
|           | p75    | 4.00   | 31.50   | 4.00        | 4.00        |
|           | p95    | 6.00   | 49.00   | 5.00        | 5.00        |
|           | p99    | 6.00   | 49.00   | 5.00        | 5.00        |
|           | Max    | 6.00   | 49.00   | 5.00        | 5.00        |
| p-value * |        | 0.753  | 0.638   | 0.675       | 0.573       |

\* from Wilcoxon Sum Rank test comparison of male and female.

**Table S37.** Spearman rank correlation for age (years) and mouthing events while playing on playgrounds.

| Activity Variables                       | r      | p-value      |
|------------------------------------------|--------|--------------|
| Mouth contact frequency (event/h) (n=24) |        |              |
| Floors                                   | −0.289 | 0.170        |
| Hands *                                  | −0.631 | <b>0.016</b> |
| Non-Dietary                              | 0.378  | 0.705        |
| Dietary                                  | −0.163 | 0.448        |
| All objects *                            | −0.459 | <b>0.024</b> |
| Mouth contact duration (min/h) (n = 24)  |        |              |
| Floors                                   | −0.289 | 0.170        |
| Hands *                                  | −0.593 | <b>0.025</b> |
| Non-Dietary *                            | −0.624 | <b>0.011</b> |
| Dietary                                  | −0.095 | 0.657        |
| All objects *                            | −0.025 | <b>0.025</b> |
| Mouth median contact duration (s)        |        |              |
| Floors (n = 1)                           | −0.289 | 0.169        |
| Hands (n = 14)                           | −0.322 | 0.261        |
| Non-Dietary * (n = 13)                   | −0.555 | <b>0.005</b> |
| Dietary (n = 6)                          | −0.122 | 0.570        |
| All objects * (n = 20)                   | −0.418 | <b>0.042</b> |

\* Significant ( $p < 0.05$ ) correlation with age (Spearman's rank correlation).

**Table S38.** Mouthing contact frequency (event/h) while on playground (n = 24) by EPA age groups.

| Age Group         |        | Floors | Hands | Dietary | Non-Dietary | All Objects |
|-------------------|--------|--------|-------|---------|-------------|-------------|
| < 2<br>N = 5      | Mean   | 0.5    | 26.6  | 6.4     | 27.2        | 33.6        |
|                   | SD     | 1.0    | 18.6  | 9.3     | 14.8        | 18.9        |
|                   | Min    | 0.0    | 9.2   | 0.0     | 5.0         | 5.0         |
|                   | p25    | 0.0    | 9.2   | 0.0     | 24.4        | 24.4        |
|                   | Median | 0.0    | 24.4  | 0.0     | 30.0        | 41.5        |
|                   | p75    | 0.0    | 46.2  | 11.5    | 30.7        | 46.2        |
|                   | p95    | 2.3    | 46.2  | 20.5    | 46.2        | 51.1        |
|                   | p99    | 2.3    | 46.2  | 20.5    | 46.2        | 51.1        |
|                   | Max    | 2.3    | 46.2  | 20.5    | 46.2        | 51.1        |
|                   |        |        |       |         |             |             |
| 2 to < 3<br>N = 5 | Mean   | -      | 34.4  | 60.7    | 47.1        | 107.8       |
|                   | SD     | -      | 27.8  | 135.8   | 34.4        | 114.7       |
|                   | Min    | -      | 7.1   | 0.0     | 4.4         | 16.5        |
|                   | p25    | -      | 11.7  | 0.0     | 16.5        | 65.2        |
|                   | Median | -      | 31.6  | 0.0     | 65.2        | 66.9        |
|                   | p75    | -      | 57.2  | 0.0     | 66.9        | 82.5        |
|                   | p95    | -      | 67.5  | 303.7   | 82.5        | 308.1       |
|                   | p99    | -      | 67.5  | 303.7   | 82.5        | 308.1       |
|                   | Max    | -      | 67.5  | 303.7   | 82.5        | 308.1       |
|                   |        |        |       |         |             |             |
| 3 to < 6<br>N = 8 | Mean   | -      | 10.8  | 86.5    | 34.8        | 121.4       |
|                   | SD     | -      | 10.3  | 161.2   | 74.8        | 163.2       |
|                   | Min    | -      | 2.9   | 0.0     | 0.0         | 0.0         |
|                   | p25    | -      | 3.6   | 0.0     | 0.0         | 1.5         |
|                   | Median | -      | 7.3   | 0.0     | 6.7         | 17.9        |
|                   | p75    | -      | 17.9  | 156.7   | 23.5        | 276.6       |

|                    |         |   |       |       |              |              |
|--------------------|---------|---|-------|-------|--------------|--------------|
|                    | p95     | - | 25.4  | 379.0 | 218.2        | 379.0        |
|                    | p99     | - | 25.4  | 379.0 | 218.2        | 379.0        |
|                    | Max     | - | 25.4  | 379.0 | 218.2        | 379.0        |
| 6 to < 11<br>N = 6 | Mean    | - | 4.8   | 1.1   | 4.3          | 5.4          |
|                    | SD      | - | 3.9   | 2.6   | 4.4          | 5.0          |
|                    | Min     | - | 1.4   | 0.0   | 0.0          | 0.0          |
|                    | p25     | - | 1.4   | 0.0   | 0.0          | 0.0          |
|                    | Median  | - | 3.9   | 0.0   | 3.3          | 5.9          |
|                    | p75     | - | 9.1   | 0.0   | 9.1          | 10.0         |
|                    | p95     | - | 9.1   | 6.4   | 10.0         | 10.3         |
|                    | p99     | - | 9.1   | 6.4   | 10.0         | 10.3         |
|                    | Max     | - | 9.1   | 6.4   | 10.0         | 10.3         |
|                    | p-value | - | 0.118 | 0.833 | <b>0.036</b> | <b>0.041</b> |

**Table S39.** Mouthing hourly duration (min/h) while on playground (n = 24) by EPA age groups.

| Age Group          |        | Floors | Hands | Dietary | Non-Dietary | All Objects |
|--------------------|--------|--------|-------|---------|-------------|-------------|
| < 2<br>N = 5       | Mean   | 0.0    | 3.1   | 0.3     | 2.7         | 2.9         |
|                    | SD     | 0.0    | 2.6   | 0.4     | 2.0         | 1.9         |
|                    | Min    | 0.0    | 0.1   | 0.0     | 0.3         | 0.3         |
|                    | p25    | 0.0    | 0.1   | 0.0     | 0.8         | 1.7         |
|                    | Median | 0.0    | 4.1   | 0.0     | 3.1         | 3.4         |
|                    | p75    | 0.0    | 5.0   | 0.3     | 4.1         | 4.1         |
|                    | p95    | 0.0    | 5.0   | 1.0     | 5.0         | 5.0         |
|                    | p99    | 0.0    | 5.0   | 1.0     | 5.0         | 5.0         |
|                    | Max    | 0.05   | 5.0   | 1.0     | 5.0         | 5.0         |
|                    |        |        |       |         |             |             |
| 2 to < 3<br>N = 5  | Mean   | -      | 0.7   | 0.9     | 0.9         | 1.9         |
|                    | SD     | -      | 0.7   | 2.1     | 0.6         | 1.7         |
|                    | Min    | -      | 0.3   | 0.0     | 0.2         | 0.6         |
|                    | p25    | -      | 0.3   | 0.0     | 0.6         | 1.0         |
|                    | Median | -      | 0.5   | 0.0     | 1.0         | 1.1         |
|                    | p75    | -      | 1.2   | 0.0     | 1.1         | 1.9         |
|                    | p95    | -      | 1.8   | 4.6     | 1.9         | 4.8         |
|                    | p99    | -      | 1.8   | 4.6     | 1.9         | 4.8         |
|                    | Max    | -      | 1.8   | 4.6     | 1.9         | 4.8         |
|                    |        |        |       |         |             |             |
| 3 to < 6<br>N = 8  | Mean   | -      | 0.3   | 1.8     | 2.8         | 4.6         |
|                    | SD     | -      | 0.2   | 4.0     | 7.0         | 7.6         |
|                    | Min    | -      | 0.1   | 0.0     | 0.0         | 0.0         |
|                    | p25    | -      | 0.2   | 0.0     | 0.0         | 0.0         |
|                    | Median | -      | 0.3   | 0.0     | 0.2         | 0.4         |
|                    | p75    | -      | 0.4   | 1.6     | 1.0         | 8.1         |
|                    | p95    | -      | 0.5   | 11.4    | 20.0        | 20.0        |
|                    | p99    | -      | 0.5   | 11.4    | 20.0        | 20.0        |
|                    | Max    | -      | 0.5   | 11.4    | 20.0        | 20.0        |
|                    |        |        |       |         |             |             |
| 6 to < 11<br>N = 6 | Mean   | -      | 0.1   | 2.8     | 0.1         | 2.8         |
|                    | SD     | -      | 0.1   | 6.7     | 0.1         | 6.7         |
|                    | Min    | -      | 0.0   | 0.0     | 0.0         | 0.0         |
|                    | p25    | -      | 0.0   | 0.0     | 0.0         | 0.0         |
|                    | Median | -      | 0.1   | 0.0     | 0.0         | 0.0         |
|                    | p75    | -      | 0.3   | 0.0     | 0.1         | 0.3         |
|                    | p95    | -      | 0.3   | 16.5    | 0.3         | 16.6        |

|  |         |   |       |       |              |       |
|--|---------|---|-------|-------|--------------|-------|
|  | p99     | - | 0.3   | 16.5  | 0.3          | 16.6  |
|  | Max     | - | 0.3   | 16.5  | 0.3          | 16.6  |
|  | p-value | - | 0.189 | 0.961 | <b>0.017</b> | 0.183 |

**Table S40.** Mouthing median duration (s) while on playground by EPA age groups.

| Age Group |        | Floors | Hands | Dietary | Non-Dietary | All Objects |
|-----------|--------|--------|-------|---------|-------------|-------------|
| < 2       | n      | 1      | 3     | 2       | 4           | 5           |
|           | Mean   | 1.00   | 4.50  | 2.00    | 4.13        | 3.50        |
|           | SD     | -      | 3.04  | 1.41    | 2.59        | 2.65        |
|           | Min    | -      | 1.00  | 1.00    | 1.00        | 1.00        |
|           | p25    | -      | 1.00  | 1.00    | 2.00        | 1.00        |
|           | Median | -      | 6.00  | 2.00    | 4.50        | 3.00        |
|           | p75    | -      | 6.50  | 3.00    | 6.25        | 6.00        |
|           | p95    | -      | 6.50  | 3.00    | 6.50        | 6.50        |
|           | p99    | -      | 6.50  | 3.00    | 6.50        | 6.50        |
|           | Max    | -      | 6.50  | 3.00    | 6.50        | 6.50        |
| 2 to < 3  | n      | 0      | 4     | 1       | 4           | 5           |
|           | Mean   | -      | 1.25  | 1.00    | 1.25        | 1.20        |
|           | SD     | -      | 0.50  | -       | 0.50        | 0.45        |
|           | Min    | -      | 1.00  | -       | 1.00        | 1.00        |
|           | p25    | -      | 1.00  | -       | 1.00        | 1.00        |
|           | Median | -      | 1.00  | -       | 1.00        | 1.00        |
|           | p75    | -      | 1.50  | -       | 1.50        | 1.00        |
|           | p95    | -      | 2.00  | -       | 2.00        | 2.00        |
|           | p99    | -      | 2.00  | -       | 2.00        | 2.00        |
|           | Max    | -      | 2.00  | -       | 2.00        | 2.00        |
| 3 to < 6  | n      | 0      | 4     | 2       | 5           | 6           |
|           | Mean   | -      | 1.75  | 1.25    | 2.40        | 1.92        |
|           | SD     | -      | 0.96  | 1.06    | 1.67        | 1.63        |
|           | Min    | -      | 1.00  | 0.50    | 1.00        | 0.50        |
|           | p25    | -      | 1.00  | 0.50    | 1.00        | 1.00        |
|           | Median | -      | 1.50  | 1.25    | 2.00        | 1.50        |
|           | p75    | -      | 2.50  | 2.00    | 3.00        | 2.00        |
|           | p95    | -      | 3.00  | 2.00    | 5.00        | 5.00        |
|           | p99    | -      | 3.00  | 2.00    | 5.00        | 5.00        |
|           | Max    | -      | 3.00  | 2.00    | 5.00        | 5.00        |
| 6 to < 11 | n      | 0      | 3     | 1       | 4           | 4           |
|           | Mean   | -      | 1.17  | 146.00  | 1.00        | 30.38       |
|           | SD     | -      | 0.29  | -       | 0.82        | 58.76       |
|           | Min    | -      | 1.00  | -       | 0.00        | 0.00        |
|           | p25    | -      | 1.00  | -       | 0.50        | 0.50        |
|           | Median | -      | 1.00  | -       | 1.00        | 1.50        |
|           | p75    | -      | 1.50  | -       | 1.50        | 60.25       |
|           | p95    | -      | 1.50  | -       | 2.00        | 118.50      |
|           | p99    | -      | 1.50  | -       | 2.00        | 118.50      |
|           | Max    | -      | 1.50  | -       | 2.00        | 118.50      |
| p-value * |        | -      | 0.385 | 0.431   | 0.125       | 0.542       |

**Table S41.** Mouthing contact frequency (event/h) while on playground (n = 24) by younger (1–6 years) and older (7–12 years).

| Age Group             |        | Floors | Hands | Dietary | Non-   | All          |
|-----------------------|--------|--------|-------|---------|--------|--------------|
| 1–6 years<br>(n = 21) | Mean   | 0.11   | 19.64 | 49.26   | 31.75  | 81.01        |
|                       | SD     | 0.50   | 20.31 | 119.10  | 49.09  | 119.24       |
|                       | Min    | 0.00   | 1.39  | 0.00    | 0.00   | 0.00         |
|                       | p25    | 0.00   | 4.31  | 0.00    | 3.85   | 10.03        |
|                       | Median | 0.00   | 9.80  | 0.00    | 16.45  | 25.42        |
|                       | p75    | 0.00   | 25.42 | 6.42    | 30.68  | 66.91        |
|                       | p95    | 0.00   | 67.50 | 313.43  | 82.50  | 334.99       |
|                       | p99    | 2.30   | 67.50 | 378.95  | 218.18 | 378.95       |
|                       | Max    | 2.30   | 67.50 | 378.95  | 218.18 | 378.95       |
| 7–12 years<br>(n = 3) | Mean   | -      | -     | 0.00    | 3.02   | 3.02         |
|                       | SD     | -      | -     | 0.00    | 5.23   | 5.23         |
|                       | Min    | -      | -     | 0.00    | 0.00   | 0.00         |
|                       | p25    | -      | -     | 0.00    | 0.00   | 0.00         |
|                       | Median | -      | -     | 0.00    | 0.00   | 0.00         |
|                       | p75    | -      | -     | 0.00    | 9.05   | 9.05         |
|                       | p95    | -      | -     | 0.00    | 9.05   | 9.05         |
|                       | p99    | -      | -     | 0.00    | 9.05   | 9.05         |
|                       | Max    | -      | -     | 0.00    | 9.05   | 9.05         |
| p-value               |        | -      | -     | -       | 0.072  | <b>0.032</b> |

\* Significant (p &lt; 0.05). Wilcoxon sum rank test.

**Table S42.** Mouthing contact duration (min/h) while on playground (n = 24) by younger (1–6 years) and older (7–12 years).

| Age Group             |        | Floors | Hands | Dietary | Non-Dietary  | All Objects  |
|-----------------------|--------|--------|-------|---------|--------------|--------------|
| 1–6 years<br>(n = 21) | Mean   | 0.04   | 0.98  | 1.76    | 1.95         | 3.71         |
|                       | SD     | 0.0    | 1.59  | 4.30    | 4.37         | 5.70         |
|                       | Min    | 0.0    | 0.02  | 0.00    | 0.00         | 0.00         |
|                       | p25    | 0.0    | 0.12  | 0.00    | 0.06         | 0.33         |
|                       | Median | 0.0    | 0.28  | 0.00    | 0.51         | 1.08         |
|                       | p75    | 0.0    | 0.67  | 0.34    | 1.58         | 4.14         |
|                       | p95    | 0.0    | 5.00  | 11.40   | 5.00         | 16.58        |
|                       | p99    | 0.0    | 5.00  | 16.52   | 20.00        | 20.00        |
|                       | Max    | 0.0    | 5.00  | 16.52   | 20.00        | 20.00        |
| 7–12 years<br>(n = 3) | Mean   | -      | -     | 0.00    | 0.00         | 0.00         |
|                       | SD     | -      | -     | 0.00    | 0.00         | 0.00         |
|                       | Min    | -      | -     | 0.00    | 0.00         | 0.00         |
|                       | p25    | -      | -     | 0.00    | 0.00         | 0.00         |
|                       | Median | -      | -     | 0.00    | 0.00         | 0.00         |
|                       | p75    | -      | -     | 0.00    | 0.00         | 0.00         |
|                       | p95    | -      | -     | 0.00    | 0.00         | 0.00         |
|                       | p99    | -      | -     | 0.00    | 0.00         | 0.00         |
|                       | Max    | -      | -     | 0.00    | 0.00         | 0.00         |
| p-value               |        | -      | -     | 0.301   | <b>0.017</b> | <b>0.012</b> |

\* Significant (p &lt; 0.05). Wilcoxon sum rank test.

**Table S43.** Mouthing duration (min/h) while children play on playgrounds by gender.

| Gender              |        | Floors | Hands | Dietary | Non-Dietary | All objects |
|---------------------|--------|--------|-------|---------|-------------|-------------|
| Males<br>(n = 11)   | Mean   | 0.04   | 1.17  | 0.83    | 1.10        | 1.93        |
|                     | SD     | -      | 1.59  | 1.58    | 1.40        | 1.71        |
|                     | Min    | -      | 0.05  | 0.00    | 0.00        | 0.00        |
|                     | p25    | -      | 0.12  | 0.00    | 0.00        | 0.05        |
|                     | Median | -      | 0.47  | 0.00    | 0.78        | 1.74        |
|                     | p75    | -      | 1.75  | 0.96    | 1.87        | 3.41        |
|                     | p95    | -      | 4.14  | 4.62    | 4.14        | 4.77        |
|                     | p99    | -      | 4.14  | 4.62    | 4.14        | 4.77        |
|                     | Max    | -      | 4.14  | 4.62    | 4.14        | 4.77        |
| Females<br>(n = 13) | Mean   | -      | 0.84  | 2.15    | 2.21        | 4.36        |
|                     | SD     | -      | 1.69  | 5.35    | 5.51        | 7.20        |
|                     | Min    | -      | 0.02  | 0.00    | 0.00        | 0.00        |
|                     | p25    | -      | 0.17  | 0.00    | 0.04        | 0.04        |
|                     | Median | -      | 0.28  | 0.00    | 0.33        | 0.33        |
|                     | p75    | -      | 0.42  | 0.00    | 0.58        | 5.00        |
|                     | p95    | -      | 5.00  | 16.52   | 20.00       | 20.00       |
|                     | p99    | -      | 5.00  | 16.52   | 20.00       | 20.00       |
|                     | Max    | -      | 5.00  | 16.52   | 20.00       | 20.00       |
| p-value *           |        | -      | 0.697 | 0.402   | 0.770       | 0.662       |

\* p-value from Wilcoxon Sum Rank test comparison of male and female

**Table S44.** Mouthing median duration (s) while children play on playgrounds by gender.

| Gender    |        | Floors | Hands | Dietary | Non-Dietary | All objects |
|-----------|--------|--------|-------|---------|-------------|-------------|
| Males     | n      | 1      | 6     | 4       | 6           | 9           |
|           | Mean   | 1.00   | 1.83  | 1.38    | 1.83        | 1.50        |
|           | SD     | -      | 2.04  | 1.11    | 2.04        | 1.70        |
|           | Min    | -      | 1.00  | 0.50    | 1.00        | 0.50        |
|           | p25    | -      | 1.00  | 0.75    | 1.00        | 1.00        |
|           | Median | -      | 1.00  | 1.00    | 1.00        | 1.00        |
|           | p75    | -      | 1.00  | 2.00    | 1.00        | 1.00        |
|           | p95    | -      | 6.00  | 3.00    | 6.00        | 6.00        |
|           | p99    | -      | 6.00  | 3.00    | 6.00        | 6.00        |
|           | Max    | -      | 6.00  | 3.00    | 6.00        | 6.00        |
| Females   | n      | 0      | 8     | 2       | 11          | 11          |
|           | Mean   | -      | 2.25  | 74.00   | 2.41        | 13.00       |
|           | SD     | -      | 1.85  | 101.82  | 1.91        | 35.04       |
|           | Min    | -      | 1.00  | 2.00    | 0.00        | 0.00        |
|           | p25    | -      | 1.00  | 2.00    | 1.00        | 1.00        |
|           | Median | -      | 1.75  | 74.00   | 2.00        | 2.00        |
|           | p75    | -      | 2.50  | 146.00  | 3.00        | 5.00        |
|           | p95    | -      | 6.50  | 146.00  | 6.50        | 118.50      |
|           | p99    | -      | 6.50  | 146.00  | 6.50        | 118.50      |
|           | Max    | -      | 6.50  | 146.00  | 6.50        | 118.50      |
| p-value * |        | -      | 0.174 | 0.156   | 0.264       | 0.041       |

\* p-value from Wilcoxon Sum Rank test comparison of male and female



**Table S45.** Mouthing frequency (event/h) while children play on playgrounds by gender.

| Gender              |        | Floors | Hands | Dietary | Non-Dietary | All objects |
|---------------------|--------|--------|-------|---------|-------------|-------------|
| Males<br>(n = 11)   | Mean   | 2.30   | 27.87 | 64.96   | 27.91       | 92.87       |
|                     | SD     | -      | 24.68 | 137.82  | 30.70       | 128.10      |
|                     | Min    | -      | 2.94  | 0.00    | 0.00        | 0.00        |
|                     | p25    | -      | 9.22  | 0.00    | 0.00        | 2.94        |
|                     | Median | -      | 20.36 | 0.00    | 24.43       | 51.13       |
|                     | p75    | -      | 46.84 | 20.45   | 65.16       | 82.50       |
|                     | p95    | -      | 67.50 | 378.95  | 82.50       | 378.95      |
|                     | p99    | -      | 67.50 | 378.95  | 82.50       | 378.95      |
|                     | Max    | -      | 67.50 | 378.95  | 82.50       | 378.95      |
| Females<br>(n = 13) | Mean   | -      | 13.46 | 24.60   | 28.37       | 52.97       |
|                     | SD     | -      | 15.13 | 86.80   | 58.44       | 102.80      |
|                     | Min    | -      | 1.39  | 0.00    | 0.00        | 0.00        |
|                     | p25    | -      | 4.08  | 0.00    | 3.85        | 4.96        |
|                     | Median | -      | 8.09  | 0.00    | 10.03       | 10.27       |
|                     | p75    | -      | 17.90 | 0.00    | 21.56       | 25.42       |
|                     | p95    | -      | 46.15 | 313.43  | 218.18      | 334.99      |
|                     | p99    | -      | 46.15 | 313.43  | 218.18      | 334.99      |
|                     | Max    | -      | 46.15 | 313.43  | 218.18      | 334.99      |
| p-value *           |        | -      | 0.197 | 0.223   | 0.705       | 0.212       |

\* p-value from Wilcoxon Sum Rank test comparison of male and female

*Figures*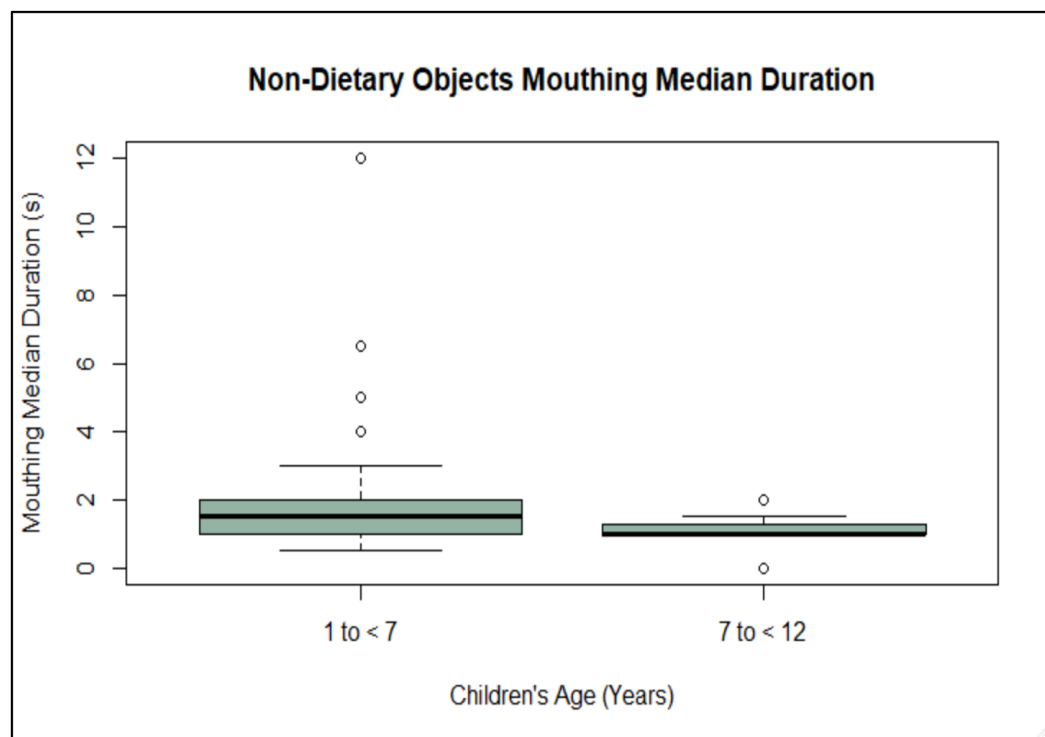**Figure S1.** Median mouthing contact duration (s) of younger and older children while playing on turf.
